# Supplementary material for: An in situ fluorine and ex situ titanium two-step co-doping strategy for efficient solar water splitting by hematite photoanodes
Source: Royal Society of Chemistry journal article supplement (doi:10.1039/d2na00029f), 2022-01-01
Supplement: d2na00029f1.pdf [file d2na00029f1.pdf]

## Electronic Supplementary Information

### ***In-Situ* Fluorine and *Ex-Situ* Titanium Two-Step Co-doping Strategy for Efficient Solar Water Splitting by Hematite Photoanodes**

Kyoungwoong Kang<sup>a, 1</sup>, Hemin Zhang<sup>b, 1\*</sup>, Jeong Hun Kim<sup>a</sup>, Woo Jin Byun<sup>a</sup>, and Jae  
Sung Lee<sup>a\*</sup>

<sup>a</sup>School of Energy and Chemical Engineering, Ulsan National Institute of Science and  
Technology (UNIST), 50 UNIST-gil, Ulsan 44919 (Republic of Korea)

<sup>b</sup>College of Materials Science and Engineering, Sichuan University, Chengdu 610065,  
China

<sup>1</sup>These authors contributed equally.

#### **\*Corresponding authors**

E-mail addresses: hmzhang@scu.edu.cn (H. Zhang), jlee1234@unist.ac.kr (J. S. Lee).

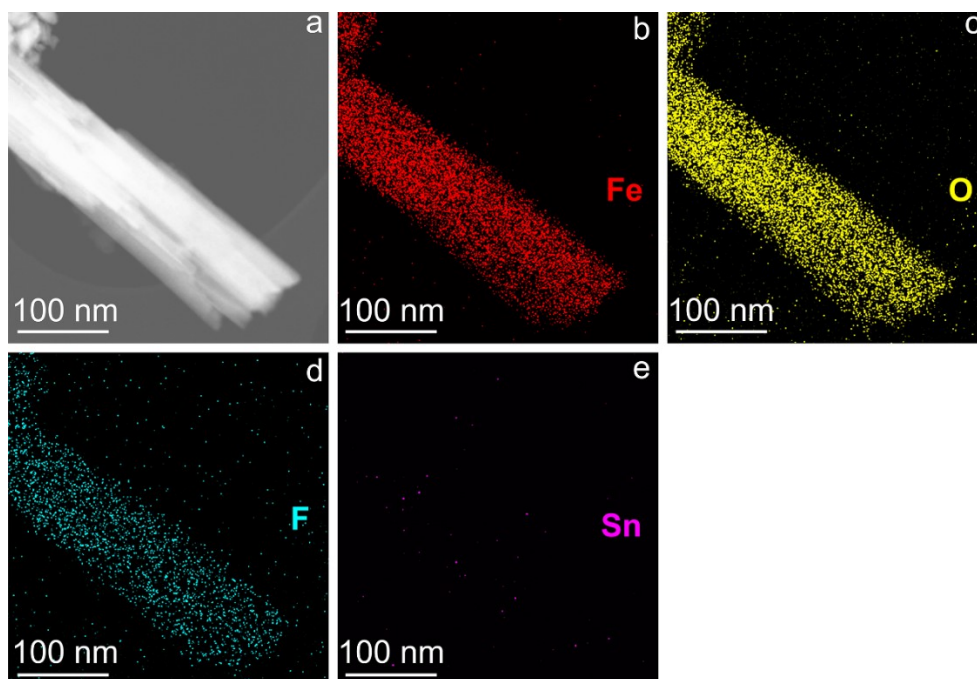

**Fig. S1.** HAAD (a) and elemental mapping (Fe (b), O (c), F (d), Sn (e)) images of the synthesized F:FeOOH nanorods.

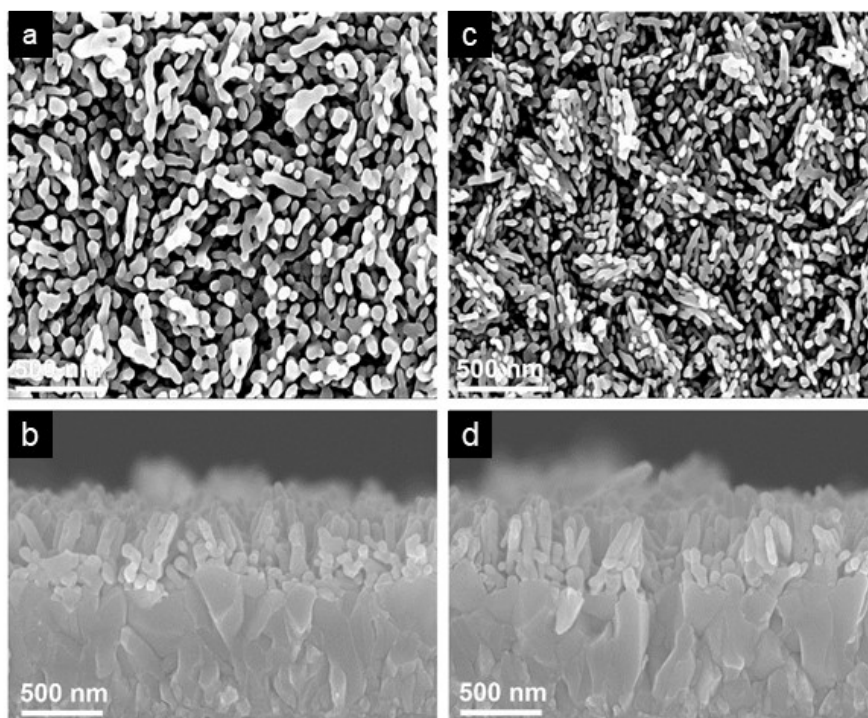

**Fig. S2.** Top view and cross-section SEM images of F:Fe<sub>2</sub>O<sub>3</sub> (a and b) and Ti:Fe<sub>2</sub>O<sub>3</sub> (c and d), respectively. Compared with F:Fe<sub>2</sub>O<sub>3</sub> samples, Ti:Fe<sub>2</sub>O<sub>3</sub> sample shows a little smaller diameter of nanorods, indicating that titanium deposited on the surface of FeOOH nanorods can prevent the diameter of nanorods from becoming bigger during annealing process. Additional benefit of F,Ti:Fe<sub>2</sub>O<sub>3</sub> sample is to suppress the drain of the doped fluorine.

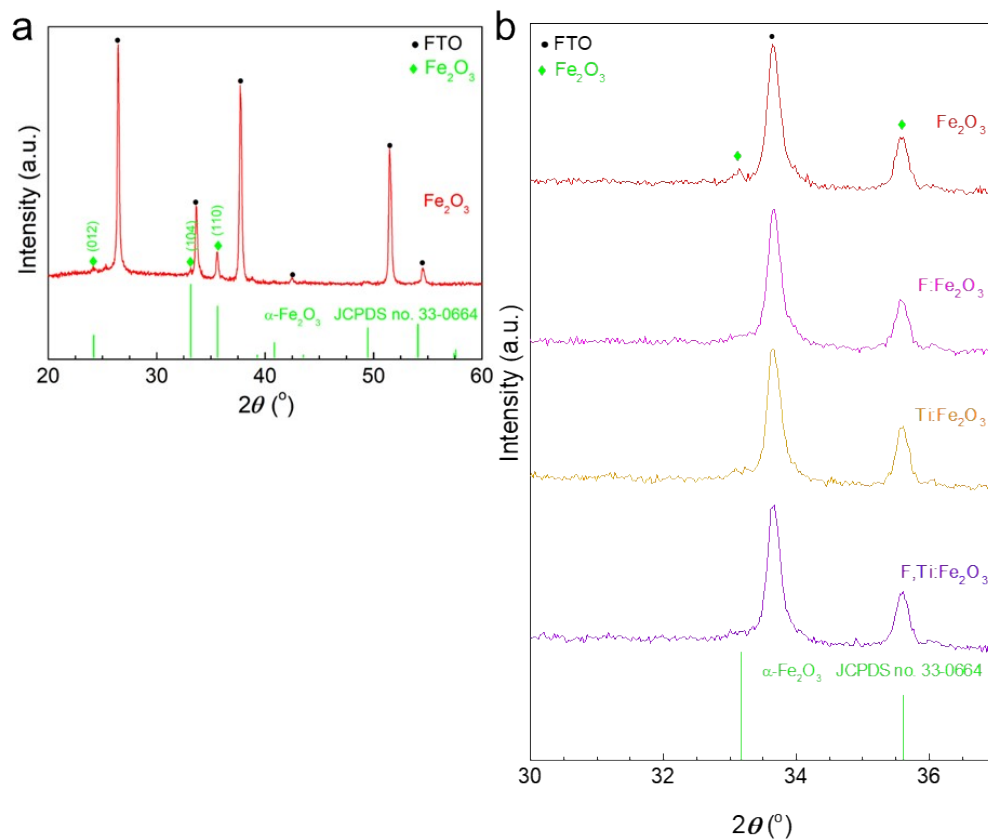

**Fig. S3.** XRD of pure bare hematite shows an obvious crystal plane of (104) (a) and the magnified XRD patterns of all samples correspondingly (b).

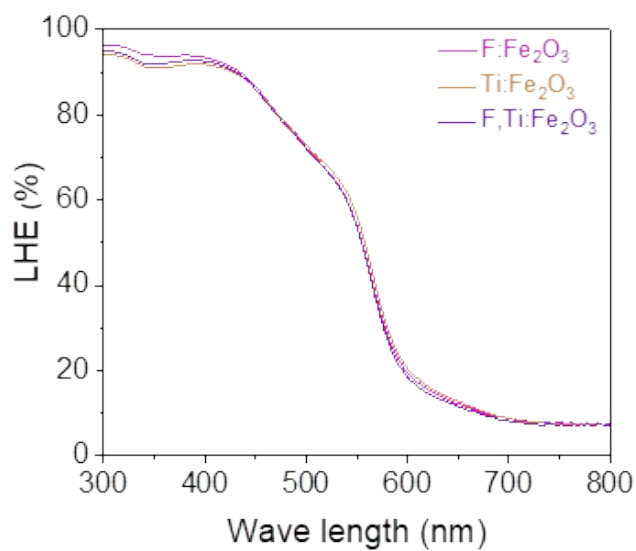

**Fig. S4.** LHE of F:Fe<sub>2</sub>O<sub>3</sub>, Ti:Fe<sub>2</sub>O<sub>3</sub> and F,Ti:Fe<sub>2</sub>O<sub>3</sub>.

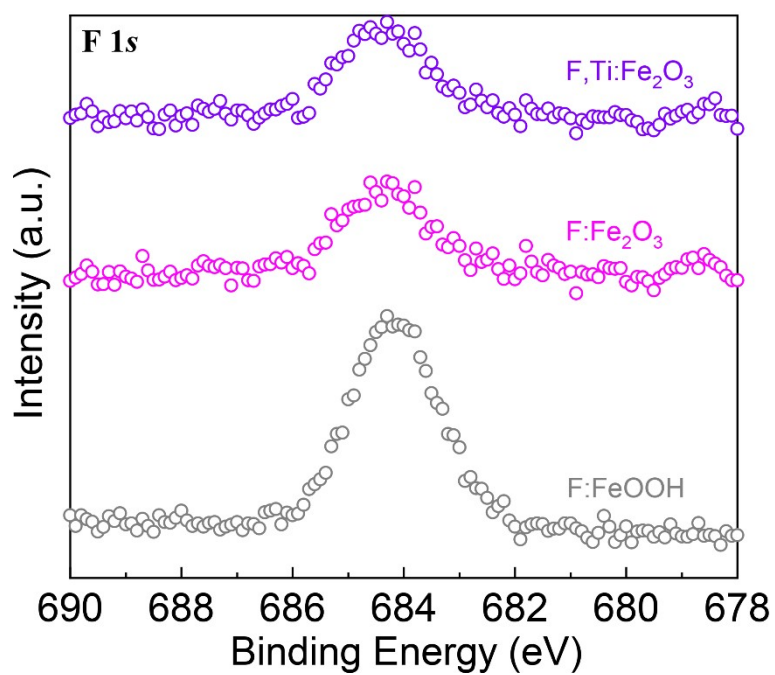

**Fig. S5.** F 1s XPS spectra of F:FeOOH, F:Fe<sub>2</sub>O<sub>3</sub> and F,Ti:Fe<sub>2</sub>O<sub>3</sub>.

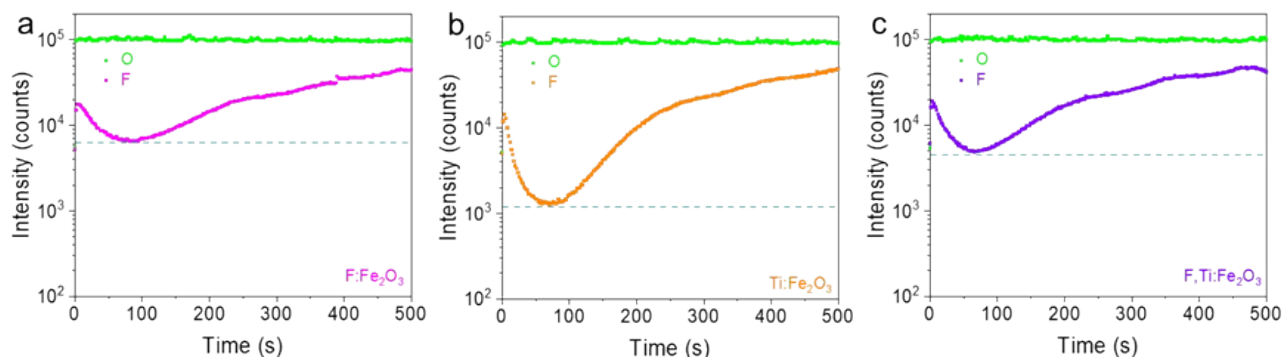

**Fig. S6.** TOF-SIMS of F:Fe<sub>2</sub>O<sub>3</sub> (a), Ti:Fe<sub>2</sub>O<sub>3</sub> (b) and F,Ti:Fe<sub>2</sub>O<sub>3</sub> (c).

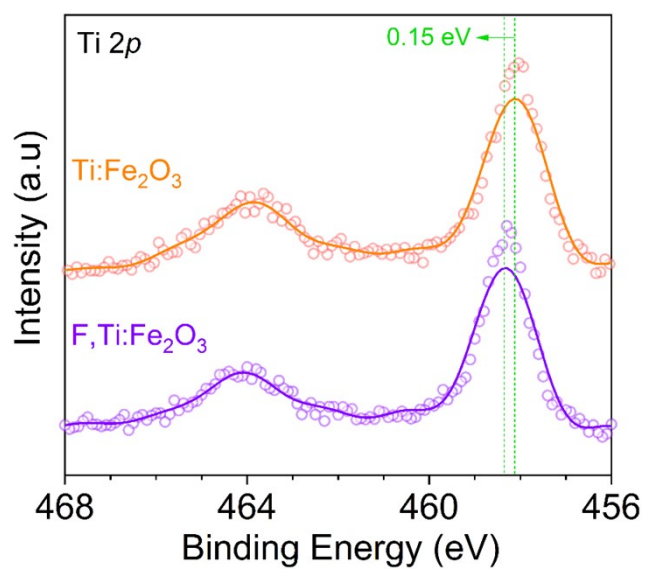

**Fig. S7.** Ti 2p XPS spectra of Ti:Fe<sub>2</sub>O<sub>3</sub> and F,Ti:Fe<sub>2</sub>O<sub>3</sub>.

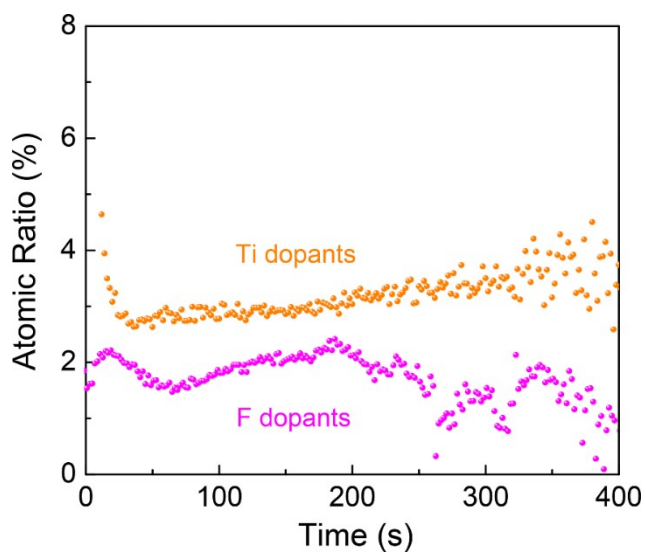

**Fig. S8.** F and Ti dopants monitored by TOF-SIMS.

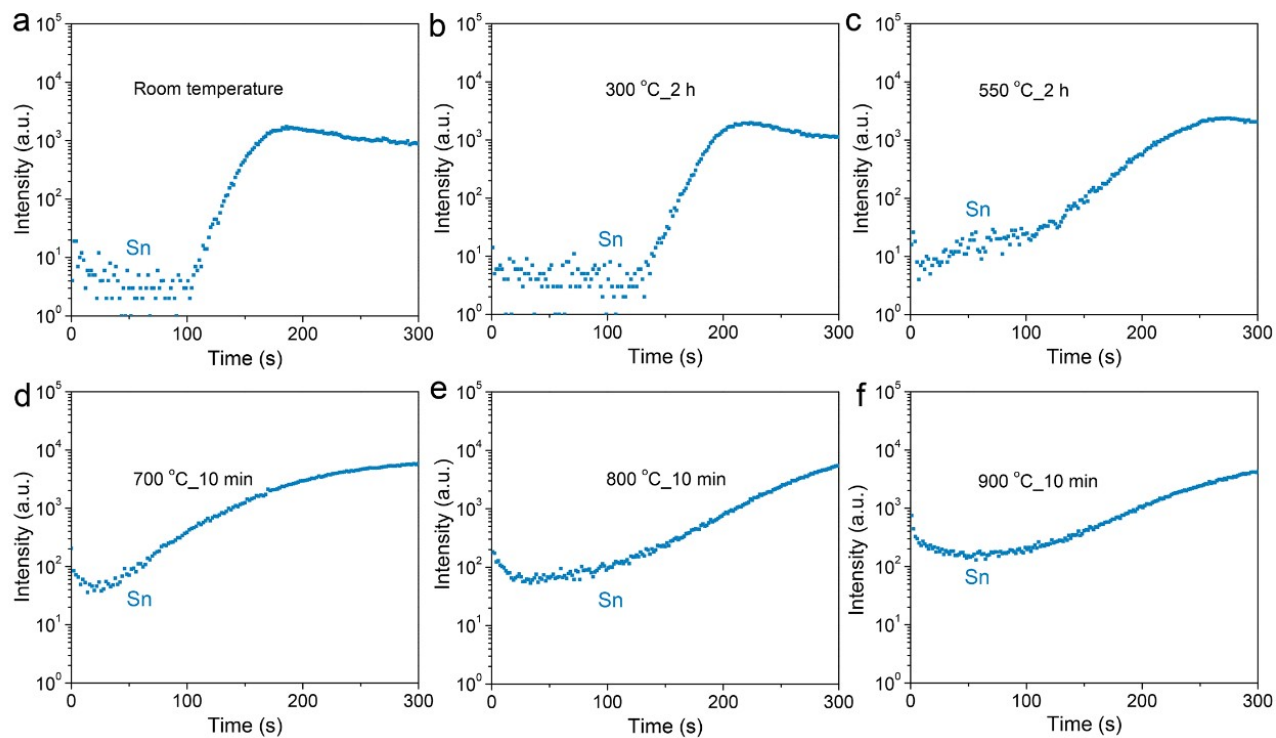

**Fig. S9.** Sn signal monitored by TOF-SIMS at different annealing conditions. (a) Room temperature. (b) 300 °C for 2 h. (c) 550 °C for 2 h. (d) 700 °C for 10 min. (e) 800 °C for 10 min. (f) 900 °C for 10 min.

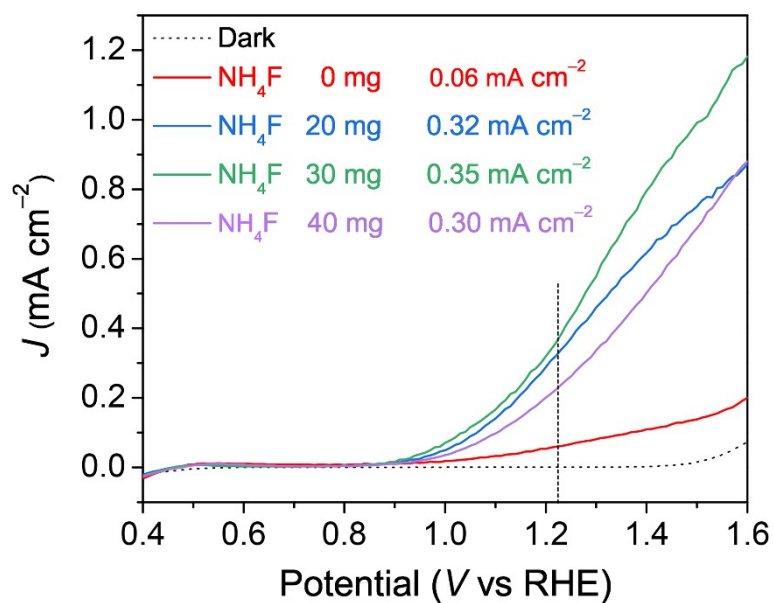

**Fig. S10.** Optimization of F dopants by addition of different amounts of  $\text{NH}_4\text{F}$ .

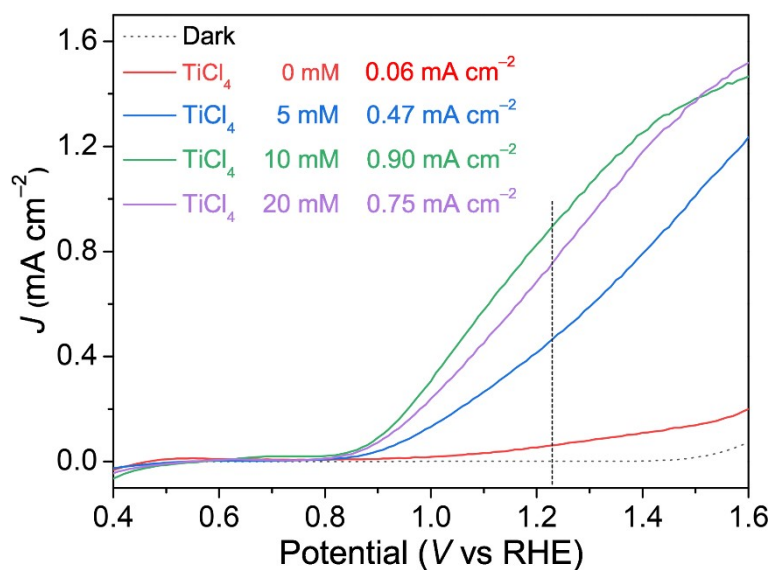

**Fig. S11.** Optimization of Ti dopants by spin coating of different  $\text{TiCl}_4$  concentrations.

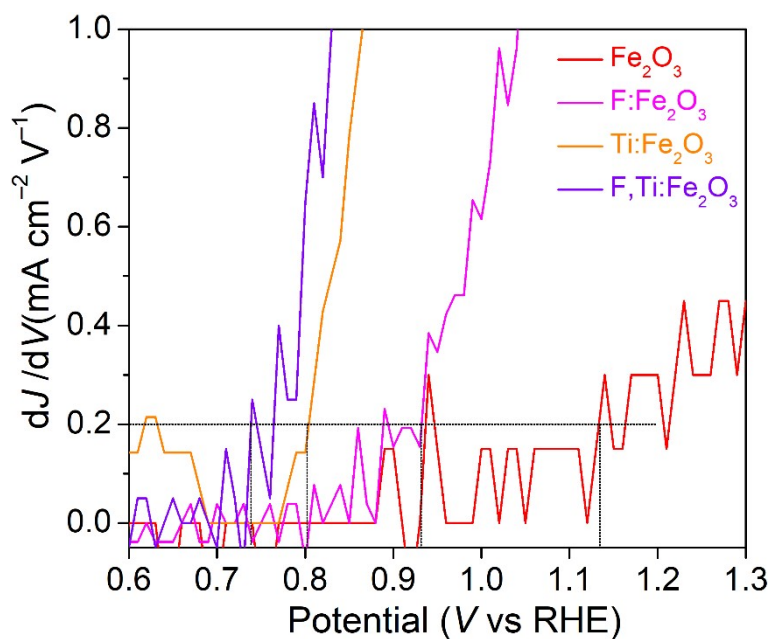

**Fig. S12.** Onset potential ( $V_{\text{on}}$ ) evaluation by first-order derivative of the photocurrent density as a function of potential. The  $V_{\text{on}}$  is defined as the value at which  $dJ/dV > 0.2 \text{ mA cm}^{-2}\text{V}^{-1}$  from obtained  $J$ - $V$  curves. The  $V_{\text{on}}$  values of bare  $\text{Fe}_2\text{O}_3$ ,  $\text{F}:\text{Fe}_2\text{O}_3$ ,  $\text{Ti}:\text{Fe}_2\text{O}_3$  and  $\text{F,Ti}:\text{Fe}_2\text{O}_3$  are 1.14, 0.93, 0.80 and 0.74  $V_{\text{RHE}}$ , respectively.

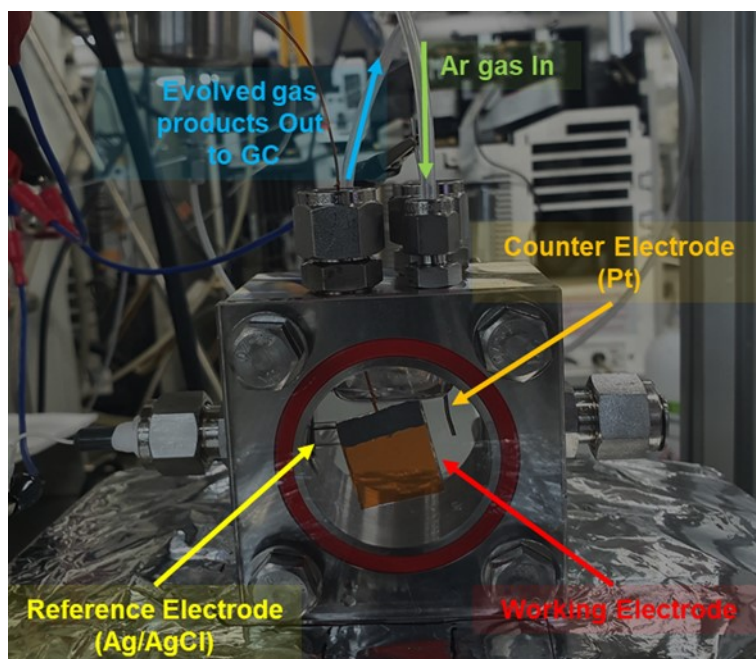

**Fig. S13.** Digital photograph of the stainless PEC reactor with a closed circulation for the measurement of  $O_2$  and  $H_2$  evolution.

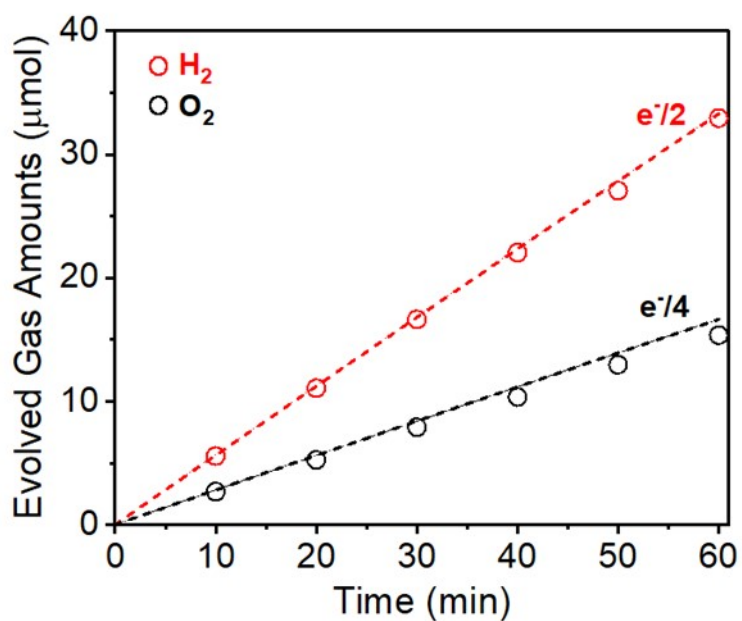

**Fig. S14.** Gas chromatography of  $O_2$  and  $H_2$  evolved from the  $F,Ti:Fe_2O_3$  photoanode at a constant potential of  $1.30 V_{RHE}$ . The result demonstrates that the ratio of evolved  $O_2$  and  $H_2$  is close to the stoichiometry of  $H_2O$ .



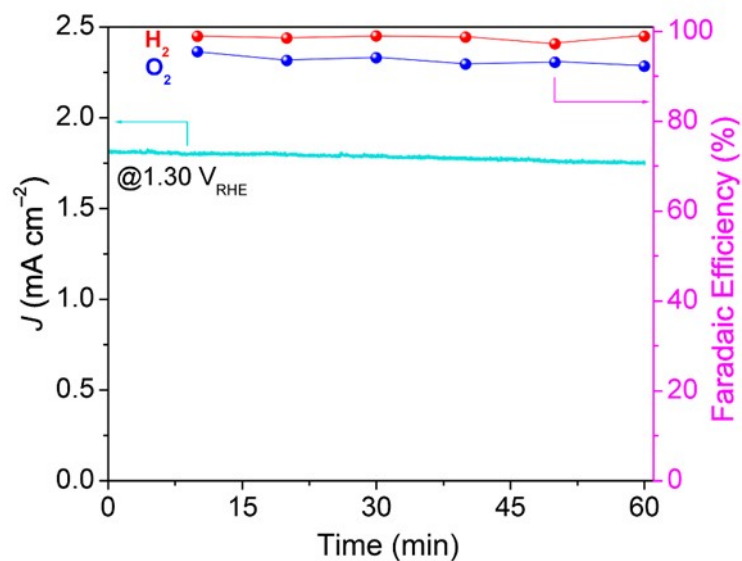

**Fig. S15.** The stability and Faradaic efficiency (F.E.) of F,Ti:Fe<sub>2</sub>O<sub>3</sub> photoanode.

The F.E. can be calculated as follows:

$$\text{F.E.}(\%) = \frac{\text{moles of the product during the duration}}{\text{theoretical moles based on measured current}} \times 100\%$$

The F.E. of O<sub>2</sub> and H<sub>2</sub> evolution reaction is 93.5% and 98.5%, respectively.

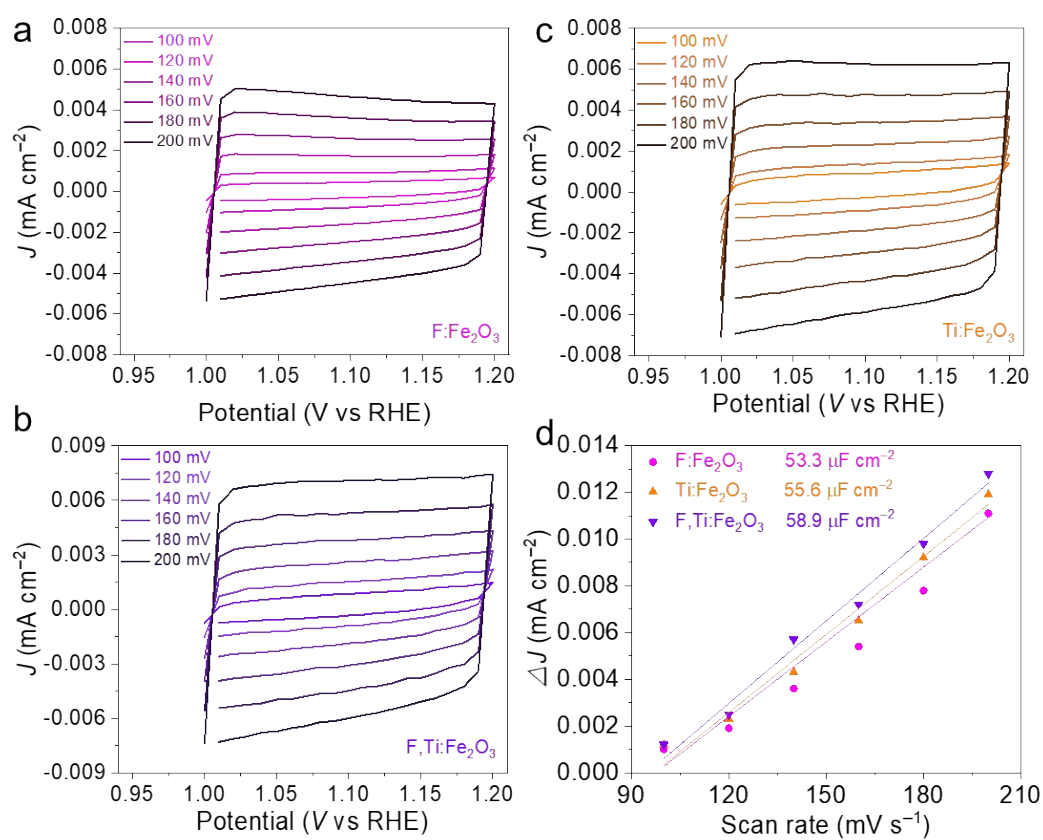

**Fig. S16.** The fitting of Nyquist plots for  $\text{Fe}_2\text{O}_3$  (a),  $\text{F}:\text{Fe}_2\text{O}_3$  (b),  $\text{Ti}:\text{Fe}_2\text{O}_3$  (c) and  $\text{F},\text{Ti}:\text{Fe}_2\text{O}_3$  (d), respectively. A representative two-RC-unit equivalent circuit (e) and the table of corresponding fitting results (f).

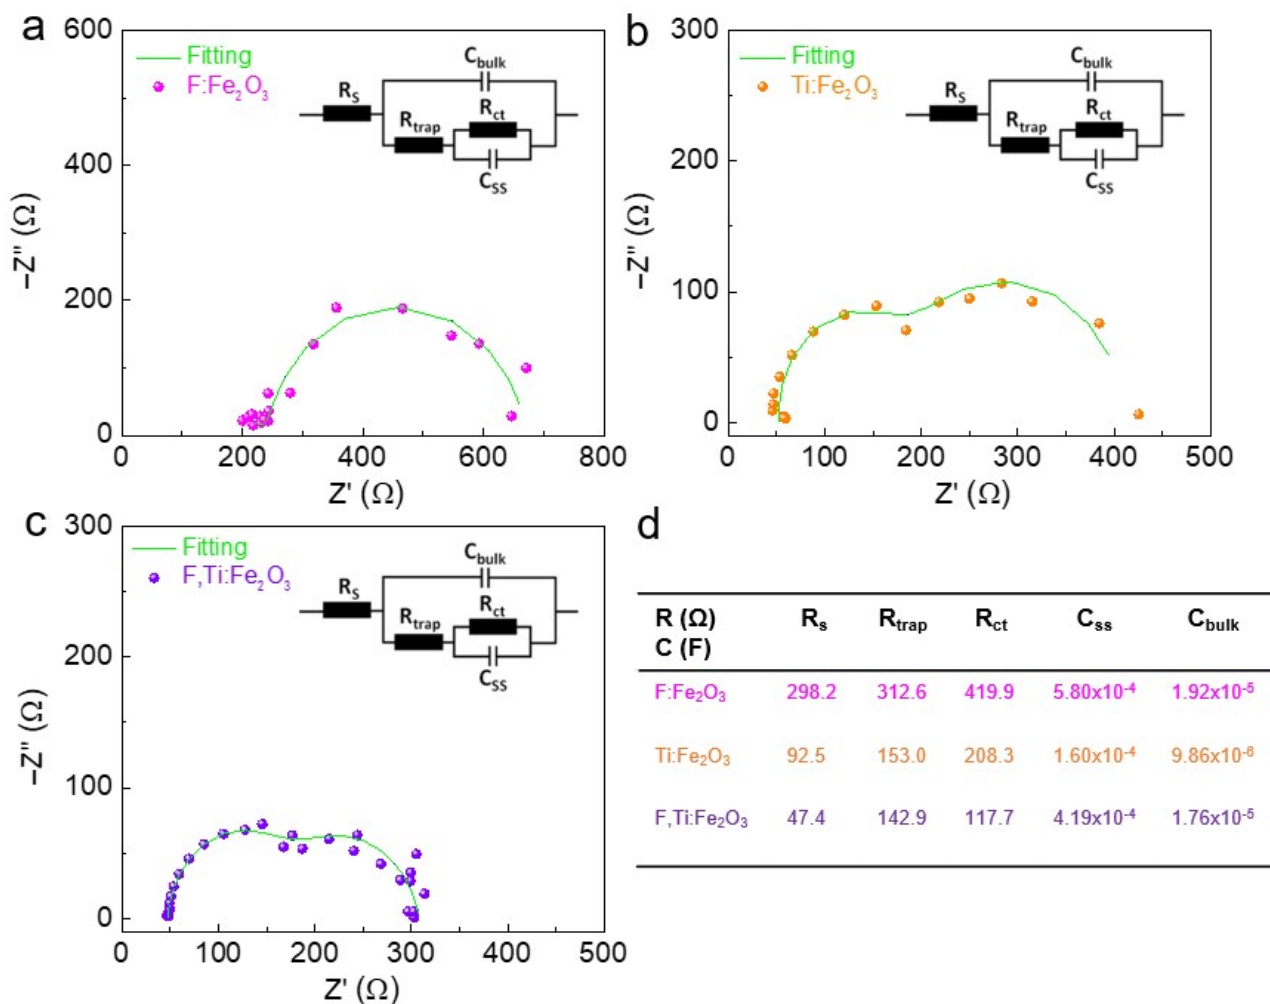

**Fig. S17.** The fitting of Nyquist plots for  $\text{F}:\text{Fe}_2\text{O}_3$  (a),  $\text{Ti}:\text{Fe}_2\text{O}_3$  (b) and  $\text{F},\text{Ti}:\text{Fe}_2\text{O}_3$  (c), respectively. The table of corresponding fitting results (d).

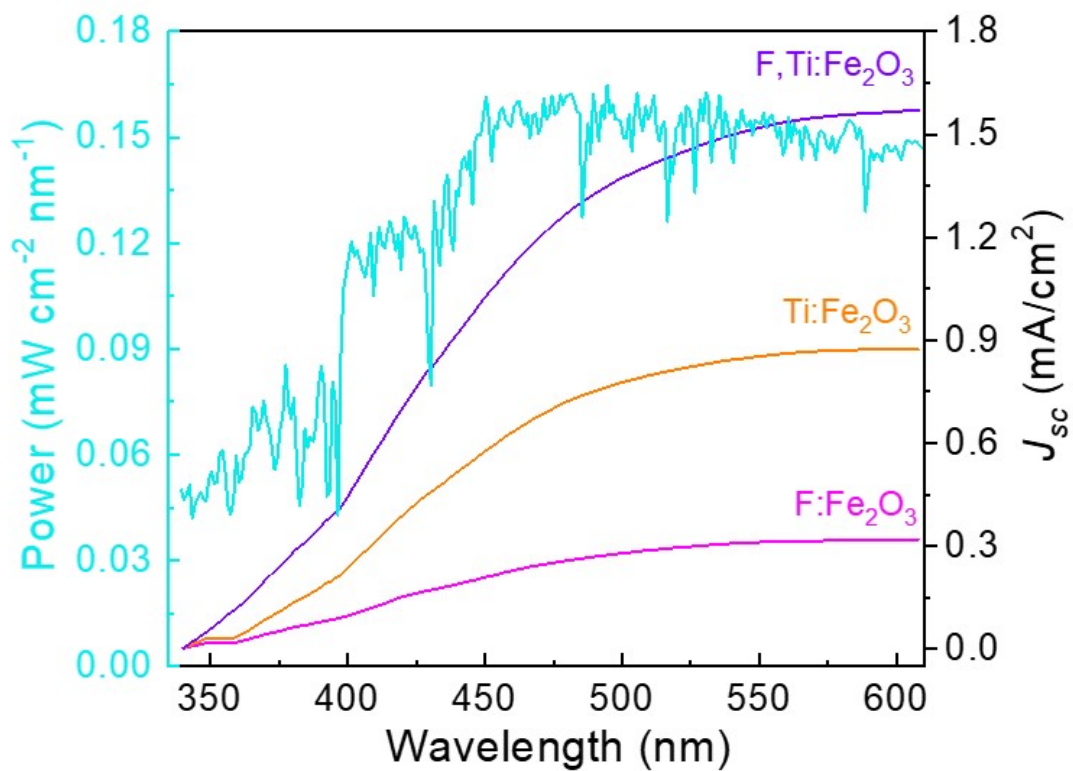

**Fig. S18.** IPCE integration of F:Fe<sub>2</sub>O<sub>3</sub> (0.32 mA cm<sup>-2</sup>), Ti:Fe<sub>2</sub>O<sub>3</sub> (0.87 mA cm<sup>-2</sup>) and F,Ti:Fe<sub>2</sub>O<sub>3</sub> (1.57 mA cm<sup>-2</sup>) with a standard AM 1.5G solar spectrum (ASTM G-173-03), respectively.

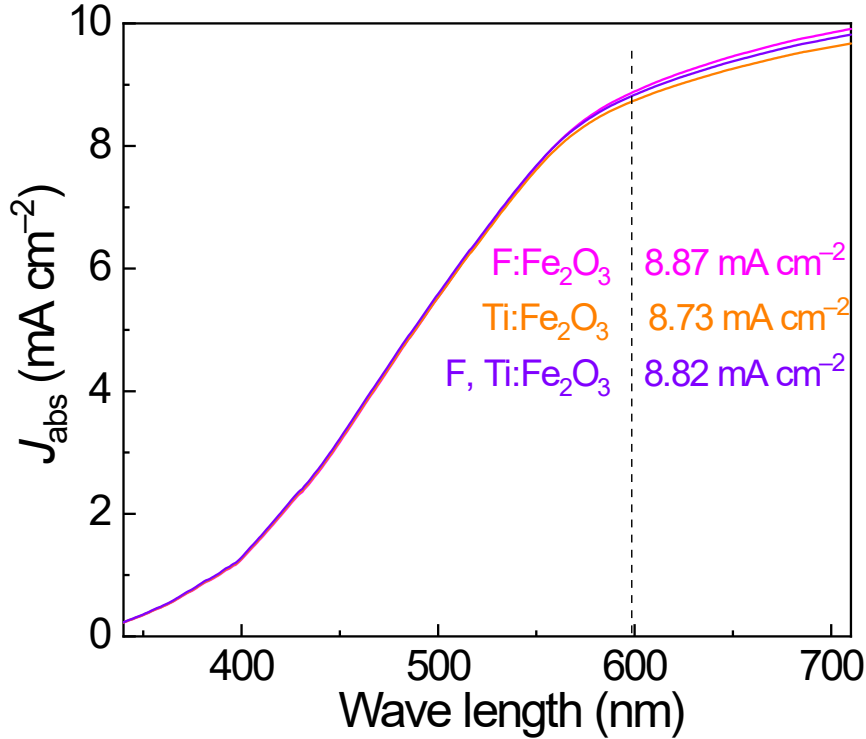

**Fig. S19.** Absorption photocurrents of  $J_{abs}$  for F:Fe<sub>2</sub>O<sub>3</sub> (8.87 mA cm<sup>-2</sup>), Ti:Fe<sub>2</sub>O<sub>3</sub> (8.73 mA cm<sup>-2</sup>) and F,Ti:Fe<sub>2</sub>O<sub>3</sub> (8.82 mA cm<sup>-2</sup>), respectively.

The obtained photocurrent density of  $J_{H_2O}$  could be described as following:

$$J_{H_2O} = J_{abs} \times \eta_{bulk} \times \eta_{surface} \quad (1)$$

Since no injection barrier of holes exists for H<sub>2</sub>O<sub>2</sub> oxidation ( $\eta_{surface} = 1$ )

$$J_{H_2O_2} = J_{abs} \times \eta_{bulk} \quad (2)$$

Hence  $\eta_{surface} = J_{H_2O} / J_{H_2O_2}$  (3)

And  $\eta_{bulk} = J_{H_2O_2} / J_{abs}$  (4)

Here,  $J_{H_2O_2}$  is the measured photocurrent density in 1 M NaOH with 0.5 M H<sub>2</sub>O<sub>2</sub> and  $J_{abs}$  is the theoretical photocurrent density that the absorbed photons are totally converted.  $J_{abs}$  can be calculated according to the correlation between absorbance and irradiation:

$$P_d = P_0 10^{-A} \quad (5)$$

$$P_{abs} = P_0 (1 - 10^{-A}) \quad (6)$$

$P_0$  (unit: mW cm<sup>-2</sup> nm<sup>-1</sup>) is power provided by solar simulator (in this case, AM 1.5G),  $P_{abs}$  is power of light actually absorbed by photoanode and  $P_d$  is power of light not absorbed at the photoanode (dissipated by reflection and penetration).  $A$  is absorbance of photoanode and light harvesting efficiency (LHE) is defined as  $1 - 10^{-A}$ . So the light not absorbed at the photoanode will be  $10^{-A}$ . Integration of  $P_{abs}(\lambda)$  (mW cm<sup>-2</sup> nm<sup>-1</sup>) along with wavelength  $\lambda$  gives the total power density (unit of mW cm<sup>-2</sup>), which is the

maximum power of photoanode.. The following formula shows the power of light absorbed by photoanode ( $J_{abs}$ ):

$$J_{abs} = \int_{\lambda_1}^{\lambda_2} \frac{\lambda}{1240} P_{abs(\lambda)} d\lambda \left( \frac{mW}{cm^2} \right) \quad (7)$$
